1

2

3 **Unique transcriptional changes in coagulation cascade genes in SARS-CoV-2-infected lung**

4 **epithelial cells: A potential factor in COVID-19 coagulopathies**

5

6

7 **Authors: Ethan S. FitzGerald<sup>1</sup> and Amanda M. Jamieson<sup>1\*</sup>**

8

9 <sup>1</sup>Division of Biology and Medicine, Department of Molecular Microbiology and Immunology,  
10 Brown University, Providence, Rhode Island, United States.

11 \*To whom correspondence should be addressed: [Amanda\\_Jamieson@brown.edu](mailto:Amanda_Jamieson@brown.edu).

12 **ABSTRACT**

13 Severe acute respiratory syndrome coronavirus 2 (SARS-CoV-2) has rapidly become a global  
14 pandemic. In addition to the acute pulmonary symptoms of COVID-19 (the disease associated  
15 with SARS-CoV-2 infection), pulmonary and distal coagulopathies have caused morbidity and  
16 mortality in many patients. Currently, the molecular pathogenesis underlying COVID-19  
17 associated coagulopathies are unknown. While there are many theories for the cause of this  
18 pathology, including hyper inflammation and excess tissue damage, the cellular and molecular  
19 underpinnings are not yet clear. By analyzing transcriptomic data sets from experimental and  
20 clinical research teams, we determined that changes in the gene expression of genes important in  
21 the extrinsic coagulation cascade in the lung epithelium may be important triggers for COVID-  
22 19 coagulopathy. This regulation of the extrinsic blood coagulation cascade is not seen with  
23 influenza A virus (IAV)-infected NHBEs suggesting that the lung epithelial derived  
24 coagulopathies are specific to SARS-Cov-2 infection. This study is the first to identify potential  
25 lung epithelial cell derived factors contributing to COVID-19 associated coagulopathy.

26

27

28 **GRAPHICAL ABSTRACT**

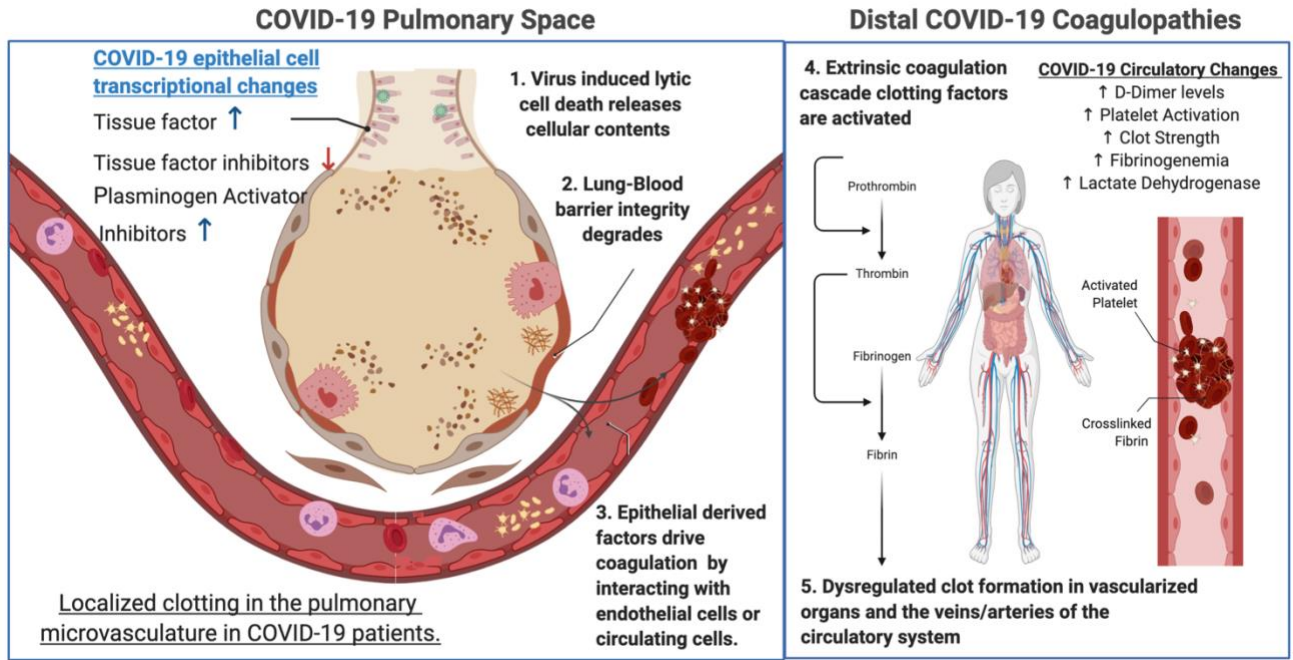

29

30 **AUTHOR SUMMARY**

31

32 **Why was this study done?**

- 33
- 34 • Severe acute respiratory syndrome coronavirus 2 (SARS-CoV-2) has rapidly become a global pandemic.
  - 35 • In addition to the acute pulmonary symptoms of COVID-19 (the disease associated with SARS-CoV-2 infection), pulmonary and distal coagulopathies have caused morbidity and mortality in many patients.
  - 36 • Currently, the molecular pathogenesis underlying COVID-19 associated coagulopathies are unknown. Understanding the molecular basis of dysregulated blood coagulation during SARS-CoV-2 infection may help promote new therapeutic strategies to mitigate these complications in COVID-19 patients.
- 37
- 38
- 39
- 40
- 41
- 42

43

43 **What did the researchers do and find?**

- 44
- 45 • We analyzed three publicly available RNA sequencing datasets to identify possible molecular etiologies of COVID-19 associated coagulopathies. These data sets include sequencing libraries from clinically isolated samples of bronchoalveolar lavage fluid (BALF) and peripheral blood mononuclear cells (PBMCs) from SARS-CoV-2 positive patients and healthy controls. We also analyzed a publicly available RNA sequencing dataset derived from *in vitro* SARS-CoV-2 infected primary normal human bronchial epithelial (NHBE) cells and mock infected samples.
  - 46 • Pathway analysis of both NHBE and BALF differential gene expression gene sets. We found that SARS-CoV-2 infection induces the activation of the extrinsic blood coagulation cascade and suppression of the plasminogen activation system in both NHBEs and cells isolated from the BALF. PBMCs did not differentially express genes regulating blood coagulation.
  - 47 • Comparison with influenza A virus (IAV)-infected NHBEs revealed that the regulation of the extrinsic blood coagulation cascade is unique to SARS-CoV-2, and not seen with IAV infection.
- 48
- 49
- 50
- 51
- 52
- 53
- 54
- 55
- 56

57

57 **What do these findings mean?**

- 58
- 59 • The hyper-activation of the extrinsic blood coagulation cascade and the suppression of the plasminogen activation system in SARS-CoV-2 infected epithelial cells may drive diverse coagulopathies in the lung and distal organ systems.
  - 60 • The gene transcription pattern in SARS-CoV-2 infected epithelial cells is distinct from IAV infected epithelial cells with regards to the regulation of blood coagulation.
- 61
- 62
- 63

64 **INTRODUCTION:**

65

66 In December of 2019, a novel respiratory coronavirus, designated SARS-CoV-2, emerged in  
67 Wuhan China.<sup>1</sup> It has since spread globally causing major societal shutdowns and >10 million  
68 confirmed infections with >500,000 recorded deaths.<sup>2,3</sup> Initial clinical reports described the  
69 symptomology of COVID-19 (the disease caused by SARS-CoV-2) as a pneumonia presenting  
70 with fever, fatigue, shortness of breath, and a dry cough.<sup>4</sup> Severe cases are often complicated by  
71 acute respiratory distress syndrome (ARDS) and cytokine storm associated hyper-inflammation,  
72 with many patients requiring mechanical ventilation and ICU admission due to hypoxia and  
73 pneumonia.<sup>4,5</sup> The pathology of COVID-19 also impacts organ systems and tissues beyond the  
74 lung, including the kidneys, gut, liver, and brain.<sup>6-9</sup> Many of the most concerning distal  
75 pathologies associated with SARS-CoV-2 infection have been associated with increased blood  
76 coagulation and clotting. These diverse coagulopathies have included venous, arterial, and  
77 microvascular thromboses of idiopathic origin.<sup>8,10-14</sup>

78

79 Blood coagulation is primarily regulated by three highly interconnected molecular signaling  
80 pathways, platelet activation, the coagulation cascade, and fibrinolysis.<sup>15,16</sup> Many excellent  
81 review articles on the molecular players in this process are available.<sup>17-25</sup> The extrinsic blood  
82 coagulation pathway is effected through a cascading activation of zymogen coagulation factors,  
83 which is balanced by endogenously encoded zymogen inhibitors. The end result of the extrinsic  
84 coagulation cascade is the formation of crosslinked fibrin clots mediated by activated thrombin.  
85 Plasmin suppresses blood coagulation and clotting via proteolytic degradation of these cross  
86 linked fibrin blood clots. Increases in pro-coagulant biomarkers are known to be associated with

87 greater risk of mortality for patients suffering acute lung injury (ALI).<sup>26–28</sup> Modulation of blood  
88 coagulation and fibrinolysis have previously been proposed as therapeutic strategies for the  
89 treatment of ALI.<sup>29</sup> Many research teams and medical associations have recommended elevated  
90 D-dimer and other serum markers of coagulation be measured as biomarkers of COVID-19  
91 disease severity for in-patient testing. Blood thinning treatments such as heparin have begun to  
92 be administered prophylactically to minimize the risk of COVID-19 associated coagulopathies,  
93 and clinical trials are ongoing to investigate the efficacy of common blood thinning medications  
94 and anti-coagulants at mitigating COVID-19 morbidity and mortality.<sup>30–33</sup> (ClinicalTrials.gov  
95 Identifiers: NCT04333407 & NCT04365309)  
96  
97 Coagulopathies concomitant to hyper-inflammatory injury such as ARDS and sepsis have been  
98 hypothesized to synergize due to interactions of inflammation and the extrinsic coagulation  
99 cascade.<sup>34,35</sup> It has been broadly theorized that COVID-19 associated coagulopathies are  
100 indirectly induced by the acute inflammation and pulmonary tissue damage associated with  
101 SARS-CoV-2, but precise mechanisms underlying this severe COVID-19 disease phenotype  
102 have remained elusive.<sup>36,37</sup> The identification of the tissue or cellular origins of the signal  
103 transducing molecules that drive dysregulated blood coagulation will be critical to understanding  
104 the pathogenesis of SARS-CoV-2-induced coagulopathies. To this end, we have performed post-  
105 hoc analysis on publicly available transcriptomics datasets of SARS-CoV-2-infected normal  
106 human bronchial epithelial cells (NHBEs), COVID-19 patient bronchoalveolar lavage fluid  
107 (BALF) and COVID-19 peripheral blood mononuclear cells (PBMCs), with the goal of  
108 generating hypotheses regarding the possible etiology of SARS-CoV-2 induced  
109 coagulopathies.<sup>38,39</sup> We found that there is a clear transcriptional signature of dysregulated blood

110 coagulation cascade signaling in NHBEs that are infected with SARS-CoV-2. These cells are  
111 infected *in vitro*, so this gene signature is not influenced by interactions with immune cells.  
112 However, transcriptional analysis of BALF cells revealed many similarities in the regulation of  
113 genes important in the coagulation cascade. In contrast, PBMCs isolated from blood do not show  
114 this gene signature, indicating that the coagulopathy defect is derived from lung signals. In  
115 addition, comparison with transcriptional data from NHBE cells infected with influenza A virus  
116 (IAV) revealed that the dysregulation of genes important in coagulation in lung epithelial cells is  
117 not generalizable to all respiratory infections.<sup>39</sup> Our study demonstrates that changes to the lung  
118 epithelium directly caused by SARS-CoV-2 infection may be responsible for the coagulopathy  
119 seen in COVID-19 patients.

120

## 121 **METHODS:**

122

123 *Xiong et al. – RNA-seq analysis of BALF and PBMCs from SARS-CoV2 infected patients*

124 BALF and PBMC sequencing data were generated through the purification of cells and

125 subsequent RNA-sequencing libraries from SARS-CoV-2 infected patients in the Zhongnan

126 Hospital of Wuhan University as described in Xiong *et al.*<sup>38</sup> These analyses were performed on

127 samples collected as part of standard treatment and diagnostic regimens. No extra burden was

128 imposed on patients.

129

130 Briefly, PBMC cells were purified from peripheral blood samples obtained from 3 patients and 3

131 healthy donors via Ficoll density gradient centrifugation. Purified PBMC in the buffy coat were

132 then transferred to a falcon tube and washed with PBS before RNA purification using Trizol and

133 Trizol LS reagents according to the manufacturer's protocol. BALF cells were isolated from  
134 patients by injecting 2% lidocaine solution into the right middle lobe or left lingular segment of  
135 the lung for local anesthesia. 100ml of room temperature sterile saline was used to lavage the  
136 right middle lobe or left lingular segment of the lung before transfer to sterile containers. Three  
137 BALF control samples isolated from healthy volunteers were downloaded from a publicly  
138 available NCBI dataset at sample accession SRR10571724, SRR10571730, and SRR10571732.<sup>40</sup>  
139

140 Library preparation for BALF and PBMC samples were performed manually using 1µg of total  
141 RNA as input. The library prep involved poly-A enrichment using oligo-dt capture probes, heat  
142 fragmentation, first and second strand synthesis with adapter ligation, and PCR library  
143 amplification. After library size selection, the prepared dsDNA libraries were denatured and  
144 circularized to allow for rolling circle amplification to form DNA nano-balls (DNBs). The DNBs  
145 were then quantified and sequenced on MGISEQ-200 platforms. PBMC and BALF samples  
146 were sequenced on either MGISEQ-2000 or Illumina NovaSeq platforms. Raw sequencing data  
147 were submitted to the Chinese Academy of Science's Genome Sequence Archive (GSA)  
148 (COVID+ BALF - GSA Accession CRP001417 ; PBMCs – GSA Accession CRA002390).  
149

150 *Blanco-Melo et al. - RNA-seq analysis of SARS-CoV2 infected NHBEs cultured in-vitro*

151 Normal human bronchial epithelial (NHBE) cells isolated from a 78 year old Caucasian woman  
152 were cultured under non-differentiating conditions in bronchial epithelial growth media  
153 supplemented with BEGM SingleQuots. (Lonza, CC-4175). SARS-CoV-2 isolate USA-  
154 WA1/2020 (NR-52281) was propagated in Vero E6 cells, and viral titers were determined via  
155 plaque assay on Vero E6 cells. NHBE ( $5 \times 10^5$ ) cells were infected with SARS-CoV-2 at a



156 multiplicity of infection of 2 for 24 hours and or mock infected in their culture media. Total  
157 RNA was then isolated via TRIzol extraction and Direct-zol RNA Miniprep Kit (Zymo research)  
158 cleanup.

159

160 Library preparation for NHBE samples was performed using the TruSeq Stranded mRNA  
161 Library Prep Kit (Illumina) with Poly-A enrichment, according to the manufacturer's  
162 instructions. Libraries were sequenced on the Illumina NextSeq 500 platform. Raw sequencing  
163 data were submitted to the National Center for Biotechnology Information's Gene Expression  
164 Omnibus (GEO Accession - GSE63473).

165

166 *Blanco-Melo et al. - RNA-seq analysis of H1N1 infected NHBEs cultured in vitro*

167 Normal human bronchial epithelial (NHBE) cells isolated from a 78 year old Caucasian woman  
168 were cultured under non-differentiating conditions in bronchial epithelial growth media  
169 supplemented with BEGM SingleQuots. (Lonza, CC-4175). A/Puerto Rico/8/1934 (PR8)  
170 influenza virus infection was performed on cells in their culture media at a multiplicity of  
171 infection of 3 for 12 hours. As described for SARS-CoV-2 infection, Total RNA was then  
172 isolated via TRIzol extraction and Direct-zol RNA Miniprep Kit (Zymo research) cleanup.

173

174 Library preparation for NHBE samples infected with influenza A virus (IAV) was performed  
175 using the TruSeq Stranded mRNA Library Prep Kit (Illumina) with Poly-A enrichment,  
176 according to the manufacturer's instructions. Libraries were sequenced on the Illumina NextSeq  
177 500 platform. Raw sequencing data were submitted to the National Center for Biotechnology  
178 Information's Gene Expression Omnibus (GEO Accession - GSE63473).

179

180 *Transcriptional analysis pipeline*

181 The analysis pipeline described below was used to analyze HBEC, PBMC, and BALF data sets  
182 for functional enrichments in differentially expressed genes. Sequencing reads were downloaded  
183 from the National Center for Biotechnology Information's Sequence Read Archive or the  
184 Chinese Genomic Data Sharing Initiative's Genome Sequence Archive in their raw fastq format.  
185 Read adapter and quality trimming was performed using the Trim Galore! package<sup>41</sup> and  
186 Sequencing quality was assessed using the FASTQC and MULTIQC packages.<sup>42,43</sup> All read files  
187 were deemed to be of sufficient quality for analysis to proceed. Sequence alignment to the  
188 GRCh38 reference transcriptome was performed using the Salmon read alignment software and  
189 differential gene expression analysis was performed using DESeq2 and the tximport  
190 packages.<sup>44,45</sup> For all differential expression analyses, the infected group of each cell type was  
191 compared to the uninfected group of the same cell type.

192

193 PantherDB was used to perform functional enrichment analysis using the Biological Processes  
194 Gene Ontology annotation set, with a user supplied gene list of all differentially expressed genes  
195 with an adjusted P value of less than then 0.2.<sup>46,47</sup> The adjusted P value cut-off of .2 was selected  
196 to include genes that may exhibit biologically significant changes in gene expression in the Gene  
197 Ontology analysis. Individual gene plots and heat maps were generated in R using the pheatmap  
198 or ggplot2 R packages to directly evaluate each gene's differential expression.<sup>48,49</sup>

199

200 **RESULTS:**

201 *Coagulation pathway gene expression in human bronchial epithelial cells is impacted by*  
 202 *infection with SARS-CoV-2*

203 In order to determine the impact that SARS-CoV-2 infection has on key factors in the  
 204 coagulation cascade we examined the transcription of genes that are important in the regulation  
 205 of hemostasis and venous thrombosis, including the extrinsic coagulation pathway and the

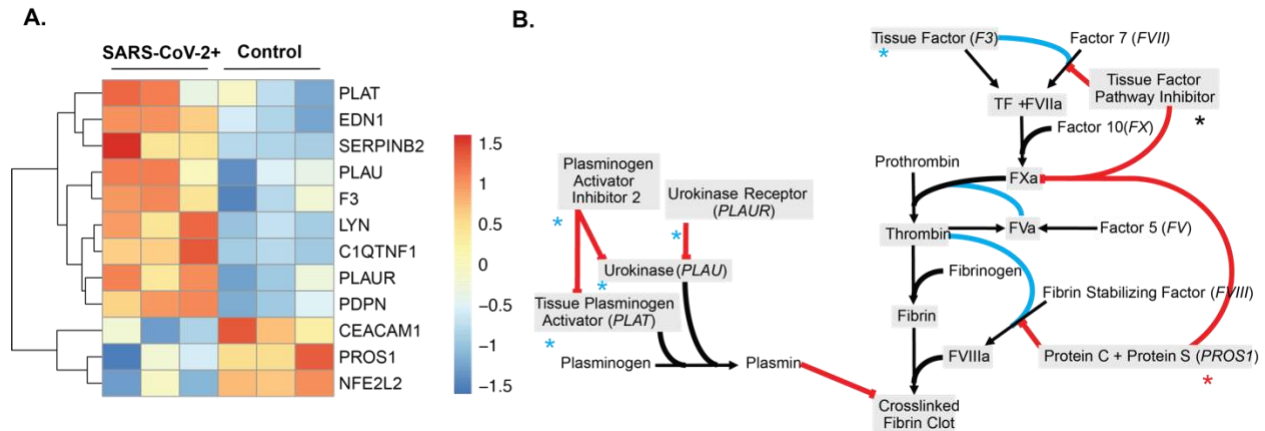

**Figure 1: The gene expression profile of differentially expressed genes within the enriched the regulation of blood coagulation GO term for SARS-CoV-2 infected NHBE cells.**(A) Heatmap of all differentially expressed genes ( $P_{adj} > .2$ ) enriched in the regulation of blood coagulation GO term. False discovery rate was calculated in PantherDB using functional enrichment analyzing all Biological Process GO Terms. (B) Pathway map of the extrinsic blood coagulation cascade (right) and the plasminogen activation system (left) with overlaid expression values. Blue asterisks indicate upregulation, black asterisks indicate no change, and red asterisks indicate down regulation.

206 plasminogen activation system. Supplemental Table 1 lists the functions of all the genes within  
 207 the blood coagulation cascade that are differentially expressed in SARS-CoV-2 infected NHBEs  
 208 relative to mock-infected controls. These genes are part of the regulation of blood coagulation  
 209 gene ontology (GO) term (GO:0030193), which was identified as significantly enriched by  
 210 PantherDB functional enrichment analysis of all NHBE differentially expressed genes ( $P_{adj} >$   
 211 0.2) (Figure 1A). Importantly, the transposition of gene expression directionality onto pathway  
 212 maps for the extrinsic blood coagulation cascade and plasminogen activation pathway (Figure 1B  
 213 and Supplemental Table 1), illustrate how infected respiratory epithelial cells may drive this  
 214 coagulopathy in COVID-19 infection. Most notably, tissue factor is significantly

215 transcriptionally upregulated while balancing inhibitory proteins are either unmodified or  
216 significantly downregulated by epithelial cells during infection. Additionally, while plasminogen  
217 activating proteins are significantly upregulated, plasminogen activating inhibitors and localizing  
218 receptors are also transcriptionally increased. The combination of these transcriptional  
219 modifications during SARS-CoV-2 infection may significantly contribute to coagulopathies  
220 associated with COVID-19.

221

222 *Regulation of tissue factor in NHBEs infected with SARS-CoV-2*

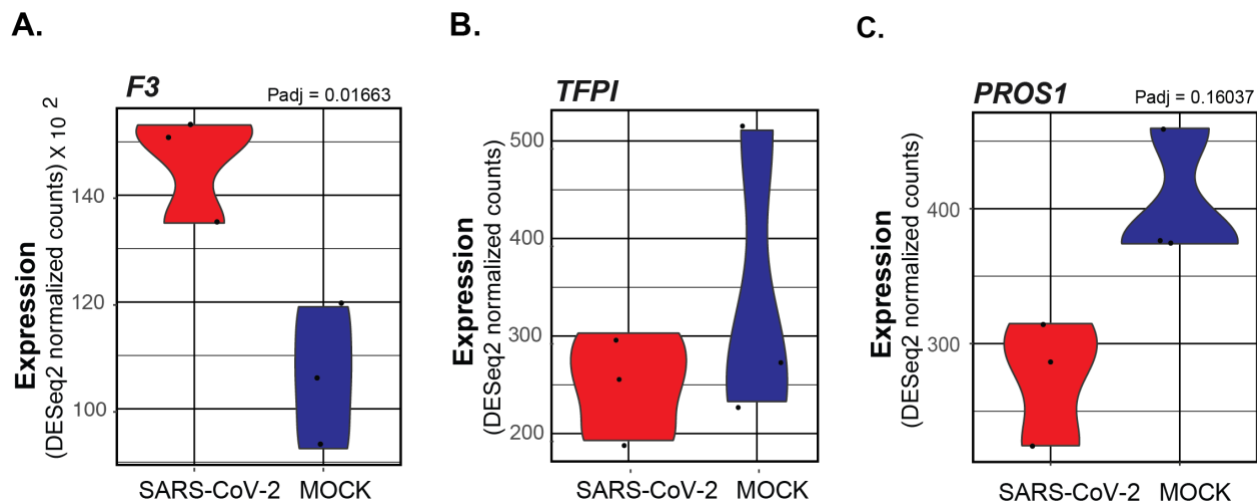

**Figure 2: Violin plots depicting raw counts of reads mapping to key regulators of the extrinsic blood coagulation cascade in mock infected and SARS-CoV-2 infected NHBE cells.** Raw counts were normalized to library size in the DESeq2 software package. Adjusted P values for all differentially expressed genes were also calculated within DESeq2. Genes lacking P values are not differentially expressed. Images were generated using GGPlot2 in the R studio environment.

223 One clear factor that could be impacting the coagulation cascade is the increased  
224 expression of *F3* in SARS-CoV-2 infected NHBEs (Figure 2A). The *F3* gene encodes the Tissue  
225 Factor protein, which is secreted by a variety of tissue cells to initiate the extrinsic coagulation  
226 cascade. This signaling cascade is carefully regulated by the balance of tissue factor protein with  
227 several endogenously encoded inhibitor proteins that suppress the signaling cascade. The first  
228 inhibitory protein in this cascade is the *TFPI* gene, which encodes the Tissue Factor Pathway

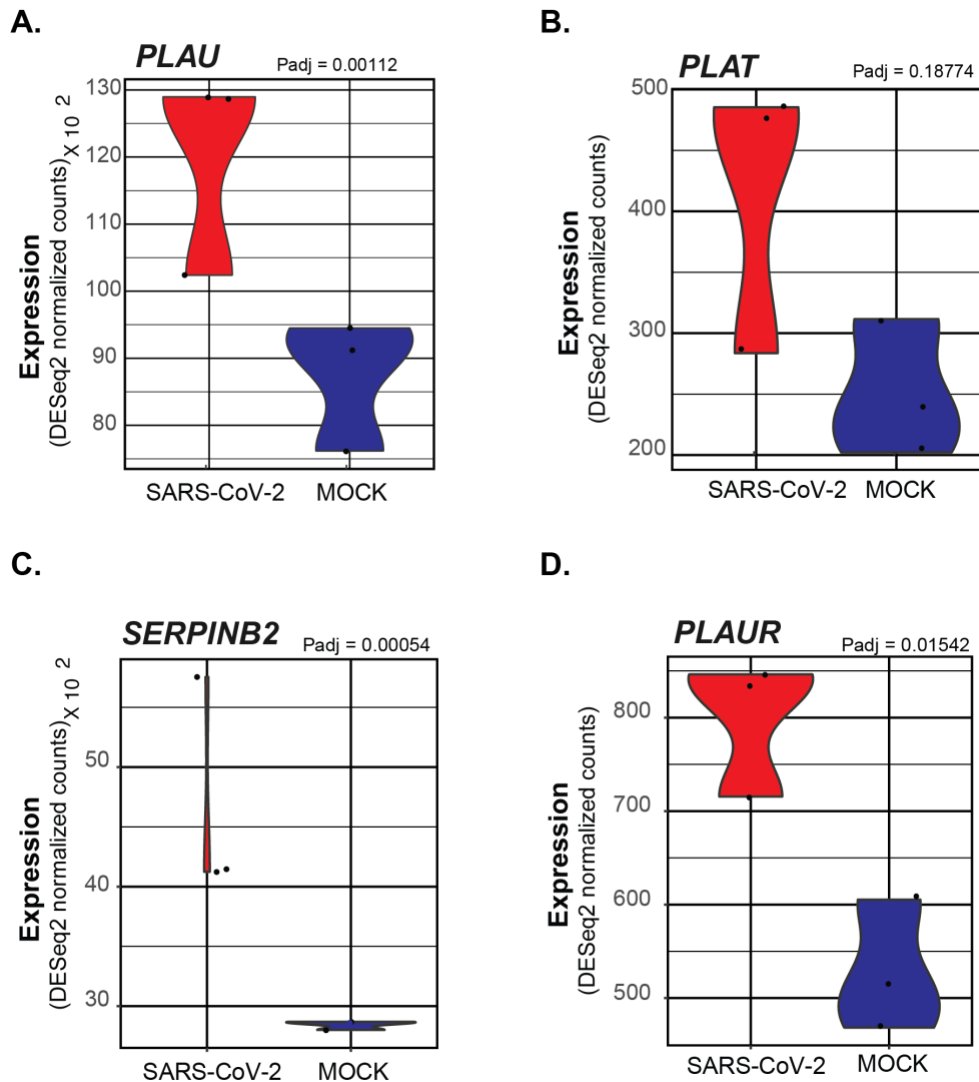

**Figure 3: Violin plots depicting raw counts of reads mapping to regulators of the plasminogen activation system in mock infected and SARS-CoV-2 infected NHBE cells. Raw counts were normalized to library size in the DESeq2 software package. Adjusted P values displayed for significant differences were also calculated within DESeq2. Images were generated using GGPlot2 in the R studio environment.**

229 Inhibitor (TFPI) protein. TFPI acts to suppress blood coagulation by inhibiting the activation of  
230 factor VII at the head of the signaling cascade. *TFPI* transcription is not significantly different in  
231 COVID infected epithelial cells relative to mock infected cells (Figure 2B). The maintenance of  
232 homeostasis between tissue factor and TFPI is essential for the maintenance of vascular systems  
233 without excessive clotting, and the observed increase of tissue factor without corollary increases  
234 of TFPI could significantly contribute to the induction of clotting in COVID-19 patients.<sup>50</sup>

235

236 *Decreased expression of PROS1 in NHBEs infected with SARS-CoV-2*

237 Another critical suppressor of the extrinsic blood coagulation cascade, the *PROS1* gene  
238 which encodes Protein S, was also found to be downregulated in SARS-CoV-2 infected NHBEs  
239 (Figure 2C). Protein S is a vitamin K dependent glycoprotein with homology to Factors VII, IX,  
240 and X in the coagulation cascade. Its primary function is to antagonize the coagulation cascade  
241 by complexing with Protein C. The complex, known as Activated Protein C, acts to inhibit the  
242 maturation of pro-coagulation factors Va and VIIIa. This results in the suppression of both pro-  
243 thrombin maturation and thrombin activity. However, the activity of both protein C and protein S  
244 is required for this effect.<sup>18</sup> It also is known to promote the activity of TFPI.<sup>23</sup> Interestingly, the  
245 binding of protein S also contributes to efferocytic clearance of apoptotic cells by mediating  
246 membrane dynamics between macrophages and epithelial cells. Its activity is highly anti-  
247 inflammatory in this capacity, and decreased expression of *PROS* expression may further  
248 exacerbate COVID-19 related pathology through diverse mechanisms.<sup>51</sup>

249

250 *NHBE cell regulation of plasminogen by SARS-CoV-2 infection*

251 Additionally, within the Regulation of Blood Coagulation GO Term, several genes  
252 regulating the activity of plasminogen were identified. Both *PLAU* (encoding Urokinase) and  
253 *PLAT* (encoding the tissue plasminogen activator protein) are observed to be significantly  
254 increased in SARS-CoV-2 NHBEs (Figures 3A and 3B). NHBEs infected with SARS-CoV-2  
255 significantly upregulate expression of *SERPINB2*, which encodes the protein Plasminogen  
256 Activator Inhibitor 2 (PAI-2) (Figure 3C). PAI-2, is known to be a potent inhibitor of both  
257 Urokinase and tissue plasminogen activator, acting through the proteolytic inactivation of

258 plasminogen activators. (DOI: 10.1007/s00018-004-4230-9) While PAI-2 is most commonly  
 259 localized within the cytoplasm, the increased release of markers of membrane permeable cell  
 260 death such as lactate dehydrogenase may provide evidence for the increased secretion of other  
 261 cytoplasmic proteins such as PAI-2. (doi:10.1001/jama.2020.1585) The expression of *PLAUR*, a  
 262 receptor localizing activated urokinase to the cell membrane, is also significantly increased in  
 263 SARS-CoV-2 infected NHBEs (Figure 3D). The localized activity of PAI-2 may significantly  
 264 inhibit the effect of PLAU/PLAUR in complex and thereby contribute to the formation of  
 265 pulmonary embolisms and distal coagulopathies.

266

267 *Regulation of blood coagulation by cells isolated from the BALF of COVID-19 Patients*

A.

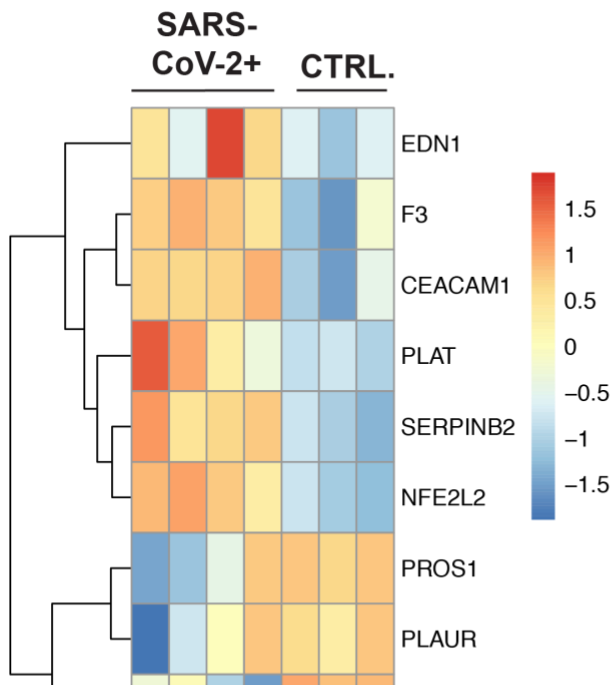

B.

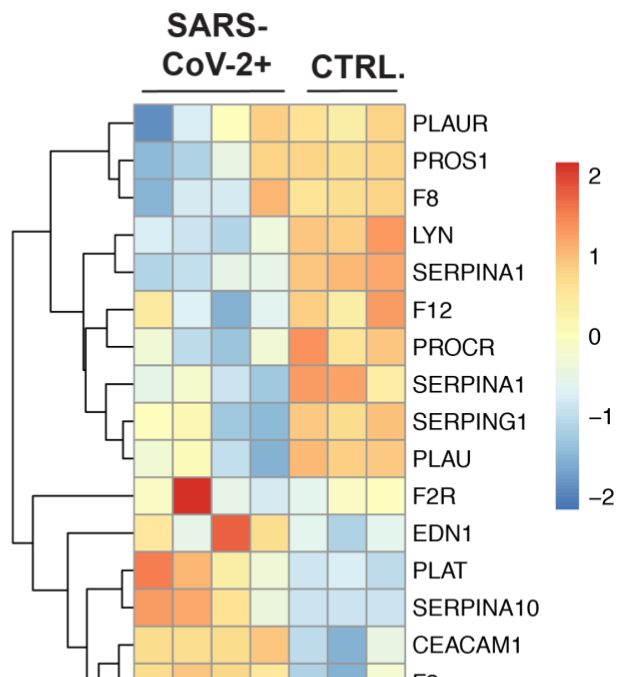

**Figure 4: The gene expression profile of differentially enriched genes from RNA isolated from the BALF of COVID-19 patients.** (A) The genes included in this heatmap were identified as enriched in the regulation of blood coagulation GO term for NHBE cells infected with SARS-CoV-2. The expression data presented in the heat map demonstrates the expression profile of these genes in BALF derived samples. (B) The genes presented in this heatmap represent all BALF differentially expressed genes ( $P. \text{adj} > .2$ ) that are also included in the Blood Coagulation GO Term (GO:0007596). PantherDB functional enrichment analysis of BALF differentially expressed genes ( $P. \text{adj} > .2$ ) including all Biological Process GO terms did not identify the Blood Coagulation GO term as statistically enriched.

268 Plotting of the subset of genes in the Regulation of Blood Coagulation (GO:0030193) GO  
269 term that were initially found to differentially expressed in SARS-CoV-2 infected NHBEs ,  
270 revealed a clear pattern of transcriptional regulation in cells isolated via BALF of COVID-19  
271 patients as well (Figure 4A). In addition, plotting of the expression data of all BALF  
272 differentially expressed genes ( $P_{adj} > .2$ ) in the Regulation of Blood Coagulation GO term  
273 revealed clear regulation of the blood coagulation cascade occurring locally within the  
274 bronchoalveolar space (Figure 4B). Many of these expression signatures recapitulate the findings  
275 we observed when analyzing *in vitro* SARS-CoV-2 infected NHBE cells.

276 These include the upregulation of pro-coagulation genes such as *F3* (tissue factor) and  
277 *SERPINB2*, along with the downregulation of inhibitory genes such as *PROS1* and *PLAUR*, and  
278 *PLAT*. Additionally, the gene *PROCR*, a receptor that augments the inhibitory activity of protein  
279 S and protein C, was found to be suppressed in the BALF during infection. Unlike the NHBE  
280 data set there is increased expression of *TFPI* and *PLAT* in the BALF from SARS-CoV-2,  
281 indicating that hosts are actively signaling to suppress coagulation during COVID-19. However,  
282 the increasing appearance of coagulopathies in COVID-19 patients indicate that this signaling is  
283 often insufficient to prevent morbidity and mortality.

284 In analyzing these data, is important to note that BALF samples contain a complex  
285 mixture of resident and recruited immune cells, along with damaged tissue cells that have been  
286 freed from the membrane, often concomitantly with cell death processes. Prior research indicates  
287 that during SARS-CoV-1 infection, there is significant epithelial denudation which may result in  
288 a greater fraction of cells in BALF samples from infected individuals containing epithelial cells  
289 and type 2 pneumocytes.<sup>52,53</sup> As such, the transcriptional signature in analyzed BALF samples  
290 represents a bulk averaging of this complex mixture. Additionally, given the impact of varying



291 co-morbidities when examining patient derived samples, (including smoking status, age, and  
292 non-related pre-existing conditions) further analysis of additional BALF patient samples is  
293 required to confirm these observations.

294

### 295 *Analysis of coagulation pathway gene expression in PBMCs*

296 In order to determine if coagulation pathway gene expression was changed in circulating  
297 immune cells we analyzed sequencing datasets generated from COVID-19 patient purified  
298 PBMCs as described in Xiong et al. PantherDB Functional enrichment analysis found no  
299 significant enrichment of genes regulating or effecting blood coagulation in PBMC datasets in

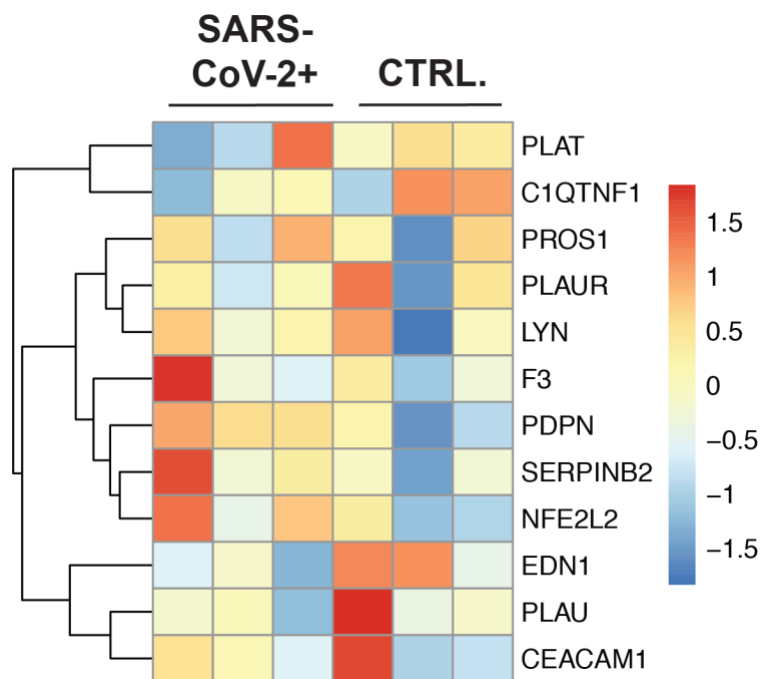

**Figure 5: The gene expression profile of differentially enriched genes from RNA isolated from PBMCs of COVID-19 patients. (A)** The genes included in this heatmap were identified as enriched in the regulation of blood coagulation GO term for NHBE cells infected with SARS-CoV-2. The expression data presented in the heat map demonstrates the expression profile of these genes in PBMC derived samples.

300 PBMCs from COVID-19 patients vs. controls (Figure 5 ; BP Full In supplement). The primary  
301 publication associated with these datasets describe expected induction of genes relating to the  
302 hyper-inflammatory response associated with ARDS and the induction of regulated cell death in

303 immune cells. From these data, we concluded it is unlikely that circulating immune cells during  
304 SARS-CoV-2 infection are inducing blood coagulation through the secretion of signals  
305 activating the extrinsic or intrinsic blood coagulation cascade in response to systemic  
306 inflammation.

307

308 *Infection of human lung epithelial cells with influenza A virus does not impact coagulation*

309 *pathway gene expression*

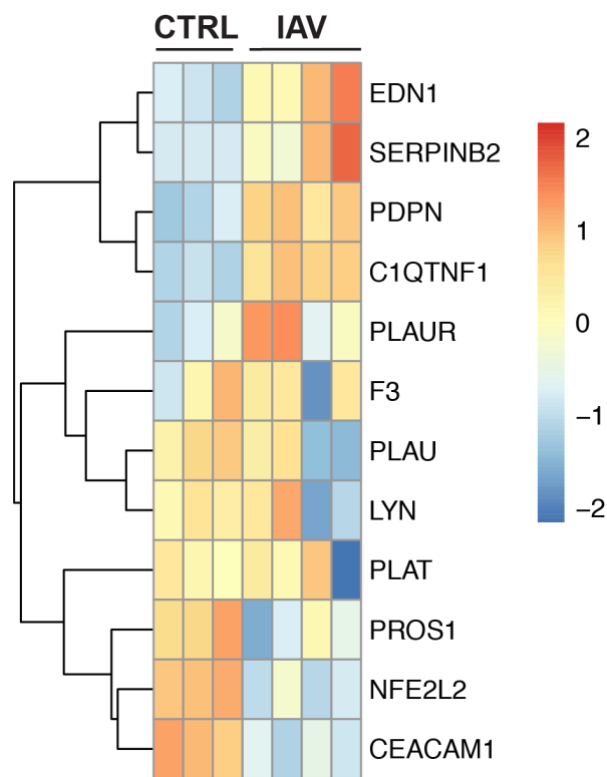

**Figure 6: The gene expression profile of differentially enriched genes from RNA isolated from NHBE cells infected with PR8 IAV.** (A) The genes included in this heatmap were identified as enriched in the regulation of blood coagulation GO term for NHBE cells infected with SARS-CoV-2. The expression data presented in the heat map demonstrates the expression profile of these genes in NHBE cell cultures that are mock infected or infected with PR8 IAV at a multiplicity of infection of 3 .

310 In order to determine if these transcriptional changes are specific for SARS-CoV-2 or are more  
311 generalizable to respiratory viruses that infect the lung epithelium we analyzed data sets from  
312 IAV infected NHBE cells. PantherDB Functional enrichment analysis found no significant

313 enrichment of genes regulating or effecting blood coagulation in these sequencing datasets when  
314 comparing IAV infected and uninfected NHBEs (Full functional enrichment results in  
315 supplement). Furthermore, heatmap plotting of genes found to be differentially expressed in  
316 NHBE cells during SARS-CoV-2 infection (Figure 1A), did not reveal any notable patterns or  
317 differential expression signatures in the context of IAV infection (Figure 6). These findings are  
318 consistent with the lack of severe coagulopathies associated with IAV infection in the clinic and  
319 further support the notion that the induction of coagulopathies during SARS-CoV-2 infection is  
320 independent of systemic inflammation common to both infections. This indicates that COVID-19  
321 associated coagulopathies may be triggered by changes in lung epithelial cell transcription  
322 patterns uniquely induced by SARS-CoV-2 infection.

323

## 324 **DISCUSSION:**

325

326 The data presented here demonstrate that SARS-CoV-2 infection of human bronchial epithelial  
327 cells may drive three key molecular responses promoting coagulopathies associated with  
328 COVID-19; (1) induction of the extrinsic coagulation cascade through the activation of tissue  
329 factor signaling without compensatory tissue factor pathway inhibitor expression; (2) the  
330 suppression of anticoagulation signaling through the down regulation of Protein S in the  
331 pulmonary space; and (3) the upregulation of plasminogen inactivation proteins and localization  
332 factors. Such activities by infected pulmonary epithelial cells *in vivo* could significantly  
333 predispose patients to the hyper-coagulation that has been associated with SARS-CoV-2. In  
334 addition, our data indicate that the same genes are not upregulated by human bronchial epithelial

335 cells infected with IAV, indicating that the severity of coagulopathy in COVID-19 patients may  
336 be derived from changes in infected lung epithelial cells.

337

338 There is mounting evidence that coagulation defects are a significant and severe pathology of  
339 COVID-19. An early clinical correspondence published in the New England Journal of Medicine  
340 reported that 5 New York City patients under the age of 50 presented with large vessel arterial  
341 stroke from March 23 to April 7, 2020.<sup>10</sup> Since then, reports of COVID-19 associated  
342 coagulopathies in the young and old have proliferated globally, with reports describing acute  
343 pulmonary embolism in the microvasculature of the lung, as well as cerebral, renal, and bowel  
344 localized embolic disease.<sup>8,11,12</sup> Reports have shown that acute pulmonary thromboembolism  
345 presents in 30% of severe clinical COVID-19 patients by pulmonary CT angiography. These  
346 emboli were found to be associated with elevation of serum D-dimer, which is produced during  
347 the degradation of crosslinked fibrin clots by enzymes such as plasmin.<sup>13</sup> Some preliminary  
348 reports have also found that biomarkers of coagulation such as clot strength, platelet and  
349 fibrinogen contributions to clots, and elevated d-dimer levels are significantly increased with  
350 ARDS caused by COVID-19.<sup>14</sup> A diverse spectrum of proinflammatory mediators shown to be  
351 dramatically upregulated in COVID-19 and other coronavirus pathologies are also known to  
352 contribute to tissue factor induced hypercoagulability.<sup>54</sup> Many other molecular factors increased  
353 with SARS-CoV-2 infection, including phosphatidylserine exposure, interferon expression,  
354 ICAM expression, angiotensin II expression, and complement activation, are also known to  
355 “decrypt” tissue factor from its inactive form on the surface of tissue cells.<sup>18</sup> Such “coagulation-  
356 inflammation-thrombosis” circuit feedback loops coupled with the multiple zymogen activation  
357 mediated feedback loops within the extrinsic blood coagulation cascade, could significantly

358 contribute to the induction of COVID-19 coagulopathy in patients.<sup>18</sup> However, further  
359 investigation of the activation of the extrinsic blood coagulation cascade or the inhibition of  
360 plasmin by respiratory epithelial cells is required to validate these hypotheses.

361

362 To best treat patients it is necessary to understand the tissue, cellular, and molecular  
363 underpinnings of COVID-19 pathology. In order to investigate the role that systemic and lung  
364 cells play in coagulopathy we analyzed three distinct data sets. The first dataset, published in  
365 Xiong *et al.* performed transcriptome sequencing on peripheral blood mononuclear cells  
366 (PBMCs) and bronchoalveolar lavage fluid (BALF) cells isolated from human patients infected  
367 with SARS-CoV-2.<sup>38</sup> The second data set, published in Blanco-Melo *et al.* performed  
368 transcriptome sequencing on commercially purchased normal human bronchial epithelial cells  
369 isolated from a 78 year old woman infected with SARS-CoV-2 and IAV.<sup>39</sup>

370

371 Coagulation cascade induction is thought to be necessary during ARDS or ALI, and may  
372 be protective.<sup>55</sup> However, when it becomes dysregulated it can be damaging. Also, systemic  
373 coagulation defects can cause severe pathologies. For instance, tissue factor and other genes  
374 within the extrinsic coagulation cascade and fibrinolysis pathway were previously found to  
375 contribute to ALI in a murine model of coronavirus infection.<sup>59</sup> ARDS is often associated with  
376 increased biomarkers of coagulation and fibrinolysis. For instance, increases in pro-coagulant  
377 biomarkers are known to be associated with greater risk of mortality for patients suffering acute  
378 lung injury. Pulmonary edema fluids and plasma from patients with acute lung injury have also  
379 been shown to contain lesser amounts of anti-coagulant protein C and higher amounts of  
380 plasminogen activator inhibitors, likely secreted from epithelial and endothelial pulmonary

381 cells.<sup>26-28</sup> However, our comparison of gene signatures from IAV infected NHBEs with those  
382 from SARS-CoV-2 infected NHBEs indicate that SARS-CoV-2 may be unique from other  
383 respiratory viruses in terms of the risk of coagulation defects. Changes to the lung epithelium,  
384 separate from inflammatory immune responses, may increase the risk of coagulopathies.

385

386 The role of the lung epithelium in coagulation defects has not been fully explored, however  
387 several lines of evidence demonstrate that it may play a key role in some instances. Lung  
388 epithelial cell lines have been shown to have increased expression of TF after incubation with  
389 pulmonary edema fluid from ARDS patients.<sup>56</sup> In addition, mouse models demonstrate that lung  
390 epithelial-derived TF may play an important role in tissue protection during ALI caused by  
391 LPS.<sup>57</sup> In vitro experiments with human epithelial cells indicate that TF may also be important  
392 for lung epithelial basal cell survival.<sup>58</sup> Taken together these lines of evidence suggest that while  
393 induction of the extrinsic coagulation cascade by lung epithelial cells may be an important host  
394 response during some stages of infection, but SARS-CoV-2 can cause such profound changes  
395 that this leads to hyper-coagulation and systemic pathologies.

396

397 Other important players in regulation of the coagulation cascade are vascular endothelial  
398 cells. Endothelial cells are known to release soluble tissue factor in response to cytokines, which  
399 may further contribute to extrinsic coagulation cascade induced coagulopathies in COVID-19  
400 patients.<sup>59</sup> The possibility of direct endothelial cell infection by SARS-CoV-2, which has been  
401 shown to occur *in vitro* and may occur *in vivo*, should also be considered as a possible  
402 mechanism for the induction of hyper-coagulation signals driving COVID-19 associated  
403 coagulopathies.<sup>60</sup> Indirect damage of endothelial cells during acute lung injury associated with

404 ARDS could also drive these signals. However, to our knowledge, there are currently no RNA-  
405 sequencing datasets with infected endothelial cell cultures or tissue available. Such data sets  
406 would be invaluable in determining how endothelial cells respond to epithelial cell coagulation  
407 signals or how endothelial cells directly modulate hyper-coagulation associated with SARS-  
408 CoV-2 infection.

409

410 Many researchers have proposed that lytic regulated cell death by respiratory epithelial  
411 cells, particularly pyroptosis, may play a significant role in COVID-19 pathogenesis.<sup>61</sup> During  
412 lytic cell death many intracellular pathogen associated molecular patterns (PAMPs) and damage  
413 associated molecular patterns (DAMPs) typically isolated within cell membranes are released.  
414 However, it is also underappreciated that diverse intracellular and membrane bound contents are  
415 also released in addition to PAMPs and DAMPs. It is possible that proteins such as tissue factor,  
416 plasminogen activating inhibitors, and pro-coagulant factors may be released into the pulmonary  
417 space during COVID-19 induced lytic cell death of epithelial cells. If this is the case, such  
418 factors may drive paracrine signaling to nearby endothelial cells. This could further exacerbate  
419 coagulation systemically by inducing the secretion of activated coagulation cascade zymogens  
420 and thrombin into the blood. Such factors could also enter the blood stream directly near  
421 damaged endothelial tissues in the lung. Epithelial cell derived hyper-coagulation factors and  
422 plasminogen inhibitors also may drive local pulmonary hyper-coagulation and further exacerbate  
423 tissue destruction in the lung during SARS-CoV-2 infection.

424

425 Further investigation of pulmonary endothelial, epithelial, and immune cell responses to  
426 SARS-CoV-2 will be essential for unraveling the mystery of COVID-19 induced hyper-

427 coagulation. The current BALF data is from bulk sequencing, which can obscure cell-type  
428 specific gene signatures. In addition, further characterization of SARS-CoV-2 infected human  
429 respiratory epithelial cells in physiologically relevant *in vitro* systems, such as air liquid interface  
430 cultures, would increase our understanding of the interaction of SARS-CoV-2 with the lung  
431 epithelium. Culture of vascular endothelial cells could be used to determine the role that either  
432 direct infection of endothelial cells or exposure to inflammatory cues may play in causing  
433 coagulopathies. Such approaches would facilitate sequencing, imaging, or proteomic  
434 investigations of the activity of tissue factor, plasminogen activation inhibitor 2, and  
435 plasminogen activators in infected lung cells.

436

437         While further investigation is required to determine if epithelial cell signaling are driving  
438 coagulopathy, several possible clinical approaches could be considered after further validation.  
439 For instance, serum samples from SARS-CoV-2 positive patients with severe COVID-19  
440 symptoms or coagulopathies could be assayed to determine the concentration and activation state  
441 of zymogens effecting the extrinsic coagulation cascade.<sup>62</sup> These approaches could similarly be  
442 utilized to design blood panels for stratifying COVID-19 in-patient coagulopathy risk or  
443 monitoring of embolic disease risk. Identifying the molecular and cellular factors that drive  
444 SARS-CoV-2 induced coagulopathy is essential, both from the perspective of understanding the  
445 biology behind SARS-CoV-2 and in terms of clinical treatments. The data in this study  
446 demonstrate that SARS-CoV-2 has a unique impact on pulmonary cells. Furthering our  
447 understanding of SARS-CoV-2 pathology, and the central role that the lung epithelium may play  
448 on this pathology will be essential in determining the ideal treatment regimens for COVID-19.

449



450 **Acknowledgements:**

451 **Funding:** This work was supported by NIGMS COBRE Award P20GM109035, National Heart  
452 Lung Blood Institute (NHLBI) 1R01HL126887-01A1 (AJ), and Brown Molecular Biology, Cell  
453 Biology, and Biochemistry T32 (NIGMS) T32GM007601-40 (EF). The funders had no role in  
454 study design, data collection and analysis, decision to publish, or preparation of the manuscript.  
455 The authors would like to thank Dr. Meredith Crane, Dr. Sharon Rounds, and Dr. Zhijin Wu for  
456 helpful comments and discussion on the manuscript.

457

458 **Bibliography:**

- 459 1. Zhu, N. *et al.* A Novel Coronavirus from Patients with Pneumonia in China, 2019. *New*  
460 *England Journal of Medicine* **382**, 727–733 (2020).
- 461 2. Dong, E., Du, H. & Gardner, L. An interactive web-based dashboard to track COVID-19 in  
462 real time. *Lancet Infect Dis* **20**, 533–534 (2020).
- 463 3. Ayittey, F. K., Ayittey, M. K., Chiwero, N. B., Kamasah, J. S. & Dzuovor, C. Economic  
464 impacts of Wuhan 2019-nCoV on China and the world. *Journal of Medical Virology* **92**,  
465 473–475 (2020).
- 466 4. Huang, C. *et al.* Clinical features of patients infected with 2019 novel coronavirus in Wuhan,  
467 China. *Lancet* **395**, 497–506 (2020).
- 468 5. Bialek, S. *et al.* Coronavirus Disease 2019 in Children — United States, February 12–April  
469 2, 2020. *MMWR Morb Mortal Wkly Rep* **69**, 422–426 (2020).
- 470 6. Naicker, S. *et al.* The Novel Coronavirus 2019 epidemic and kidneys. *Kidney Int* **97**, 824–  
471 828 (2020).

- 472 7. Zhang, C., Shi, L. & Wang, F.-S. Liver injury in COVID-19: management and challenges.  
473 *Lancet Gastroenterol Hepatol* **5**, 428–430 (2020).
- 474 8. Bhayana, R. *et al.* Abdominal Imaging Findings in COVID-19: Preliminary  
475 Observations. *Radiology* 201908 (2020) doi:10.1148/radiol.2020201908.
- 476 9. Mao, L. *et al.* Neurologic Manifestations of Hospitalized Patients With Coronavirus Disease  
477 2019 in Wuhan, China. *JAMA Neurol* **77**, 683–690 (2020).
- 478 10. Oxley, T. J. *et al.* Large-Vessel Stroke as a Presenting Feature of Covid-19 in the Young.  
479 *New England Journal of Medicine* **382**, e60 (2020).
- 480 11. Grillet, F., Behr, J., Calame, P., Aubry, S. & Delabrousse, E. Acute Pulmonary Embolism  
481 Associated with COVID-19 Pneumonia Detected by Pulmonary CT  
482 Angiography. *Radiology* 201544 (2020) doi:10.1148/radiol.2020201544.
- 483 12. Lushina, N., Kuo, J. S. & Shaikh, H. A. Pulmonary, Cerebral, and Renal Thromboembolic  
484 Disease Associated with COVID-19 Infection. *Radiology* 201623 (2020)  
485 doi:10.1148/radiol.2020201623.
- 486 13. Leonard-Lorant, I. *et al.* Acute Pulmonary Embolism in COVID-19 Patients on CT  
487 Angiography and Relationship to D-Dimer Levels. *Radiology* 201561 (2020)  
488 doi:10.1148/radiol.2020201561.
- 489 14. Ranucci, M. *et al.* The procoagulant pattern of patients with COVID-19 acute respiratory  
490 distress syndrome. *Journal of Thrombosis and Haemostasis* **n/a**,.
- 491 15. Chapin, J. C. & Hajjar, K. A. Fibrinolysis and the control of blood coagulation. *Blood Rev*  
492 **29**, 17–24 (2015).
- 493 16. Smith, S. A., Travers, R. J. & Morrissey, J. H. How it all starts: initiation of the clotting  
494 cascade. *Crit Rev Biochem Mol Biol* **50**, 326–336 (2015).

- 495 17. Mackman Nigel, Tilley Rachel E. & Key Nigel S. Role of the Extrinsic Pathway of Blood  
496 Coagulation in Hemostasis and Thrombosis. *Arteriosclerosis, Thrombosis, and Vascular*  
497 *Biology* **27**, 1687–1693 (2007).
- 498 18. Chu, A. J. Tissue Factor, Blood Coagulation, and Beyond: An Overview. *International*  
499 *Journal of Inflammation* vol. 2011 e367284  
500 <https://www.hindawi.com/journals/iji/2011/367284/> (2011).
- 501 19. Grover Steven P. & Mackman Nigel. Tissue Factor. *Arteriosclerosis, Thrombosis, and*  
502 *Vascular Biology* **38**, 709–725 (2018).
- 503 20. Pieters, M. & Wolberg, A. S. Fibrinogen and fibrin: An illustrated review. *Res Pract Thromb*  
504 *Haemost* **3**, 161–172 (2019).
- 505 21. Maroney, S. A. *et al.* Hyperactivatable Protein C Expression Partially Rescues the  
506 Embryonic Lethality of TFPI Null Mice but Surviving Mice Develop Severe Hydrocephalus.  
507 *Blood* **126**, 422–422 (2015).
- 508 22. Hackeng, T. M., Maurissen, L. F. A., Castoldi, E. & Rosing, J. Regulation of TFPI function  
509 by protein S. *Journal of Thrombosis and Haemostasis* **7**, 165–168 (2009).
- 510 23. Hackeng, T. M., Seré, K. M., Tans, G. & Rosing, J. Protein S stimulates inhibition of the  
511 tissue factor pathway by tissue factor pathway inhibitor. *PNAS* **103**, 3106–3111 (2006).
- 512 24. Shetty, S. *et al.* Induction of Tissue Factor by Urokinase in Lung Epithelial Cells and in the  
513 Lungs. *Am J Respir Crit Care Med* **181**, 1355–1366 (2010).
- 514 25. Ye, S. & Goldsmith, E. J. Serpins and other covalent protease inhibitors. *Current Opinion in*  
515 *Structural Biology* **11**, 740–745 (2001).

- 516 26. McClintock, D., Zhuo, H., Wickersham, N., Matthay, M. A. & Ware, L. B. Biomarkers of  
517 inflammation, coagulation and fibrinolysis predict mortality in acute lung injury. *Critical*  
518 *Care* **12**, R41 (2008).
- 519 27. Oddo, M., Schaller, M.-D., Feihl, F., Ribordy, V. & Liaudet, L. From evidence to clinical  
520 practice: Effective implementation of therapeutic hypothermia to improve patient outcome  
521 after cardiac arrest\*. *Critical Care Medicine* **34**, 1865–1873 (2006).
- 522 28. A, S., JI, W., Js, W., Lb, W. & Ma, M. Acute lung injury and the coagulation pathway:  
523 Potential role of gene polymorphisms in the protein C and fibrinolytic pathways. *Intensive*  
524 *Care Med* **32**, 1293–1303 (2006).
- 525 29. Sebag, S. C., Bastarache, J. A. & Ware, L. B. Therapeutic Modulation of Coagulation and  
526 Fibrinolysis in Acute Lung Injury and the Acute Respiratory Distress Syndrome. *Curr*  
527 *Pharm Biotechnol* **12**, 1481–1496 (2011).
- 528 30. Zhou, F. *et al.* Clinical course and risk factors for mortality of adult inpatients with COVID-  
529 19 in Wuhan, China: a retrospective cohort study. *Lancet* **395**, 1054–1062 (2020).
- 530 31. D-dimer as a biomarker for disease severity and mortality in COVID-19 patients: a case  
531 control study. (2020) doi:10.21203/rs.3.rs-20850/v1.
- 532 32. Griffin, D. O. *et al.* Early Release - Pulmonary Embolism and Increased Levels of d-Dimer  
533 in Patients with Coronavirus Disease - Volume 26, Number 8—August 2020 - Emerging  
534 Infectious Diseases journal - CDC. doi:10.3201/eid2608.201477.
- 535 33. Tang, N. *et al.* Anticoagulant treatment is associated with decreased mortality in severe  
536 coronavirus disease 2019 patients with coagulopathy. *Journal of Thrombosis and*  
537 *Haemostasis* **18**, 1094–1099 (2020).

- 538 34. Frantzeskaki, F., Armaganidis, A. & Orfanos, S. E. Immunothrombosis in Acute Respiratory  
539 Distress Syndrome: Cross Talks between Inflammation and Coagulation. *RES* **93**, 212–225  
540 (2017).
- 541 35. Abraham, E. Coagulation Abnormalities in Acute Lung Injury and Sepsis. *Am J Respir Cell*  
542 *Mol Biol* **22**, 401–404 (2000).
- 543 36. Willyard, C. Coronavirus blood-clot mystery intensifies. *Nature* **581**, 250–250 (2020).
- 544 37. McGonagle, D., O'Donnell, J. S., Sharif, K., Emery, P. & Bridgewood, C. Immune  
545 mechanisms of pulmonary intravascular coagulopathy in COVID-19 pneumonia. *The Lancet*  
546 *Rheumatology* **2**, e437–e445 (2020).
- 547 38. Xiong, Y. *et al.* Transcriptomic characteristics of bronchoalveolar lavage fluid and peripheral  
548 blood mononuclear cells in COVID-19 patients. *Emerging Microbes & Infections* **9**, 761–  
549 770 (2020).
- 550 39. Blanco-Melo, D. *et al.* Imbalanced Host Response to SARS-CoV-2 Drives Development of  
551 COVID-19. *Cell* **181**, 1036–1045.e9 (2020).
- 552 40. Michalovich, D. *et al.* Obesity and disease severity magnify disturbed microbiome-immune  
553 interactions in asthma patients. *Nature Communications* **10**, 5711 (2019).
- 554 41. Babraham Bioinformatics - Trim Galore!  
555 [https://www.bioinformatics.babraham.ac.uk/projects/trim\\_galore/](https://www.bioinformatics.babraham.ac.uk/projects/trim_galore/).
- 556 42. Babraham Bioinformatics - FastQC A Quality Control tool for High Throughput Sequence  
557 Data. <http://www.bioinformatics.babraham.ac.uk/projects/fastqc/>.
- 558 43. Ewels, P., Magnusson, M., Lundin, S. & Källner, M. MultiQC: summarize analysis results for  
559 multiple tools and samples in a single report. *Bioinformatics* **32**, 3047–3048 (2016).

- 560 44. Patro, R., Duggal, G., Love, M. I., Irizarry, R. A. & Kingsford, C. Salmon: fast and bias-  
561 aware quantification of transcript expression using dual-phase inference. *Nat Methods* **14**,  
562 417–419 (2017).
- 563 45. Love, M. I., Huber, W. & Anders, S. Moderated estimation of fold change and dispersion for  
564 RNA-seq data with DESeq2. *Genome Biology* **15**, 550 (2014).
- 565 46. Thomas, P. D. *et al.* PANTHER: A Library of Protein Families and Subfamilies Indexed by  
566 Function. *Genome Res.* **13**, 2129–2141 (2003).
- 567 47. Thomas, P. D. *et al.* Applications for protein sequence-function evolution data:  
568 mRNA/protein expression analysis and coding SNP scoring tools. *Nucleic Acids Res.* **34**,  
569 W645-650 (2006).
- 570 48. Wickham, H. *ggplot2: Elegant Graphics for Data Analysis*.
- 571 49. Kolde, R. Pheatmap: pretty heatmaps. *R package version 1*, (2012).
- 572 50. Crawley James T.B. & Lane David A. The Haemostatic Role of Tissue Factor Pathway  
573 Inhibitor. *Arteriosclerosis, Thrombosis, and Vascular Biology* **28**, 233–242 (2008).
- 574 51. Kawano, M. & Nagata, S. Efferocytosis and autoimmune disease. *Int Immunol* **30**, 551–558  
575 (2018).
- 576 52. Pambuccian, S. E. The COVID-19 pandemic: implications for the cytology laboratory.  
577 *Journal of the American Society of Cytopathology* **9**, 202–211 (2020).
- 578 53. Franks, T. J. *et al.* Lung pathology of severe acute respiratory syndrome (SARS): a study of  
579 8 autopsy cases from Singapore. *Human Pathology* **34**, 743–748 (2003).
- 580 54. Chu, A. J. Tissue factor mediates inflammation. *Arch. Biochem. Biophys.* **440**, 123–132  
581 (2005).

- 582 55. Rc, C. Role of coagulation cascade proteases in lung repair and fibrosis. *Eur Respir J Suppl*  
583 **44**, 33s–35s (2003).
- 584 56. Bastarache, J. A. *et al.* The alveolar epithelium can initiate the extrinsic coagulation cascade  
585 through expression of tissue factor. *Thorax* **62**, 608–616 (2007).
- 586 57. Shaver, C. M. *et al.* Regulation of alveolar procoagulant activity and permeability in direct  
587 acute lung injury by lung epithelial tissue factor. *Am. J. Respir. Cell Mol. Biol.* **53**, 719–727  
588 (2015).
- 589 58. Ahmad, S. *et al.* Tissue factor signals airway epithelial basal cell survival via coagulation  
590 and protease-activated receptor isoforms 1 and 2. *Am. J. Respir. Cell Mol. Biol.* **48**, 94–104  
591 (2013).
- 592 59. Szotowski Björn, Antoniak Silvio, Poller Wolfgang, Schultheiss Heinz-Peter & Rauch  
593 Ursula. Procoagulant Soluble Tissue Factor Is Released From Endothelial Cells in Response  
594 to Inflammatory Cytokines. *Circulation Research* **96**, 1233–1239 (2005).
- 595 60. Varga, Z. *et al.* Endothelial cell infection and endotheliitis in COVID-19. *The Lancet* **395**,  
596 1417–1418 (2020).
- 597 61. Yap, J. K. Y., Moriyama, M. & Iwasaki, A. Inflammasomes and Pyroptosis as Therapeutic  
598 Targets for COVID-19. *The Journal of Immunology* (2020) doi:10.4049/jimmunol.2000513.
- 599 62. Key, N. S. & Mackman, N. Tissue factor and its measurement in whole blood, plasma, and  
600 microparticles. *Semin. Thromb. Hemost.* **36**, 865–875 (2010).

601
